# Supplementary material for: Occurrence and predictors of pericardial effusion requiring invasive treatment following heart valve surgery
Source: HighWire-hosted journal article supplement (doi:10.1136/openhrt-2021-001880), 2022-01-01
Supplement: openhrt-2021-001880supp001_data_supplement.pdf [file openhrt-2021-001880supp001_data_supplement.pdf]

# Supplementary Materials

**Supplementary Table S1. Overview of procedure codes**

| Type of valve   | Procedure code                                                                                               |
|-----------------|--------------------------------------------------------------------------------------------------------------|
| Aortic valve    | KFCA00, KFCA50, KFCA60, KFCA70, KFMA20, KFMC00, KFMC20, KFMC96, KFMD, KFMD00, KFMD10, KFMD33, KFMD96         |
| Mitral valve    | KFKB, KFKB10, KFKC00, KFKC10, KFKC20, KFKC30, KFKC50, KFKC60, KFKC70, KFKC96, KFKD00, KFKD10, KFKD96, KDKW96 |
| Tricuspid valve | KFGC10, KFGE10                                                                                               |

**Supplementary Table S2. Characteristics of patients with significant pericardial effusion during index admission and after discharge**

|                                                                     | Pericardial effusion during index admission | Pericardial effusion after discharge |
|---------------------------------------------------------------------|---------------------------------------------|--------------------------------------|
| N                                                                   | 125                                         | 105                                  |
| <b>Characteristics</b>                                              |                                             |                                      |
| Sex, male, n (%)                                                    | 84 (67)                                     | 90 (86)                              |
| <i>Age-groups, n (%)</i>                                            |                                             |                                      |
| 18-65 years                                                         | 54 (43)                                     | 62 (59)                              |
| Age, years, median (IQR)                                            | 68 (58-73)                                  | 61 (52-71)                           |
| <b>Pre-operative information</b>                                    |                                             |                                      |
| Reduced pulmonary function <sup>a</sup> , n (%)                     | 53 (42)                                     | 34 (34)                              |
| EuroScore II (logistic), median (IQR)                               | 2.18 (1.21-3.80)                            | 1.19 (0.68-2.28)                     |
| Estimated glomerular filtration rate <sup>b</sup> ml/min <60, n (%) | 29 (24)                                     | 9 (10)                               |
| Atrial fibrillation, n (%)                                          | 38 (30)                                     | 13 (12)                              |
| Anticoagulations, n (%)                                             | 14 (11)                                     | 5 (5)                                |
| Diabetes <sup>c</sup> , n (%)                                       | 20 (16)                                     | 11 (10)                              |
| Ejection fraction <50, n (%)                                        | 49 (40)                                     | 25 (26)                              |
| Previous cardiac surgery, n (%)                                     | 11 (9)                                      | <5                                   |
| Previous PCI, n (%)                                                 | 10 (8)                                      | 10 (10)                              |
| NYHA class ≥3, n (%)                                                | 60 (48)                                     | 26 (27)                              |
| Body Mass Index, median (IQR)                                       | 26.5 (23.4-29.6)                            | 27.2 (24.0-29.2)                     |
| Current or former smoker, n (%)                                     | 69 (55)                                     | 57 (54)                              |
| Alcohol intake above national recommendations, n (%)                | 7 (6)                                       | 13 (12)                              |
| <i>Primary diagnosis, n (%)</i>                                     |                                             |                                      |
| Aortic valve stenosis                                               | 67 (54)                                     | 58 (55)                              |
| Aortic valve regurgitation                                          | 27 (22)                                     | 33 (31)                              |
| Mitral valve stenosis or regurgitation                              | 30 (24)                                     | 14 (13)                              |
| <b>Surgical information, n (%)</b>                                  |                                             |                                      |
| <i>Type of valve procedure</i>                                      |                                             |                                      |
| Aortic valve, biological                                            | 63 (50)                                     | 53 (50)                              |
| Aortic valve, mechanical                                            | 31 (25)                                     | 38 (36)                              |
| Aortic valve, repair                                                | <5                                          | <5                                   |
| Mitral valve, replacement <sup>d</sup>                              | 14 (11)                                     | <5                                   |
| Mitral valve, repair                                                | 12 (10)                                     | 9 (9)                                |
| Concomitant CABG, n (%)                                             | 20 (16)                                     | 10 (10)                              |
| <b>Post-procedure related, n (%)</b>                                |                                             |                                      |
| ECC, minutes, median (IQR)                                          | 118 (97-161)                                | 103 (87-132)                         |
| Re-operation, all, n (%)                                            | 22 (18)                                     | 5 (2)                                |
| Re-operation, bleeding, n (%)                                       | <5                                          | 5 (2)                                |
| Need for blood transfusions, n (%)                                  | 74 (59)                                     | 26 (26)                              |

|                                                    |            |          |
|----------------------------------------------------|------------|----------|
| Post-operative atrial fibrillation, n (%)          | 102 (82)   | 48 (48)  |
| New-onset postoperative atrial fibrillation, n (%) | 68 (54)    | 38 (38)  |
| Length of stay, days, median (IQR)                 | 16 (13-23) | 8 (6-10) |

IQR, interquartile range, 25<sup>th</sup> to 75<sup>th</sup> quartile. PCI, Percutaneous Coronary Intervention, NYHA, New York Heart Association Class, CABG, Coronary Artery Bypass Grafting, EEC, Extra Corporal Circulation.

<sup>a</sup> Patients with forced expiratory volume, %  $\leq$ 80% of predicted value and/or a history of chronic obstructive pulmonary disease

<sup>b</sup> Estimated glomerular filtration rate estimated by the Cockcroft-Gault Equation

<sup>c</sup> Patients with diabetes; insulin, peroral and non-pharmacological treatment

<sup>d</sup> Both biological and mechanical mitral valve replacement

A significant pericardial effusion was defined as a pericardial effusion requiring drainage/pericardiocentesis
